# Supplementary material
Source: publisher site journal article supplement (https://cdn.jamanetwork.com/ama/content_public/journal/jama/939016/joi220113supp5_prod_1666033246.92384.pdf)
Supplement: Supplementary file 1 [file joi220113supp5_prod_1666033246.92384.pdf]

## **Data Sharing Statement**

Global Burden of Disease Long COVID Collaborators. Estimated global proportions of individuals with persistent fatigue, cognitive, and respiratory symptom clusters following symptomatic COVID-19 in 2020 and 2021. *JAMA*. Published online October 10, 2022. doi:10.1001/jama.2022.18931

### **Data**

**Data available:** Yes

**Data types:** Deidentified participant data in Appendix 3 (tabulated input data)

**How to access data:** Request for data can be sent to [swulf@uw.edu](mailto:swulf@uw.edu). Data can only be shared if permission has been granted by data custodians.

**When available:** With publication

### **Supporting Documents**

**Document types:** Excel spreadsheet (Appendix 3)

### **Additional Information**

**Who can access the data:** Researchers whose proposed use of the data has been approved

**Types of analyses:** Meta-analysis or systematic review

**Mechanisms of data availability:** After approval of a methodologically sound proposal to access deidentified individual-level data up to 1 year after publication.
